# Supplementary material for: Using InVEST to evaluate water yield services in Shangri-La, Northwestern Yunnan, China
Source: PeerJ. 2022 Jan 14;10:e12804. doi: 10.7717/peerj.12804 (PMC8763040; doi:10.7717/peerj.12804)
Supplement: Supplemental Information 1 [file peerj-10-12804-s001.xls]

## Sheet: soildata
X	Y	Soil genetic layer	sand/%	silt/%	clay/%	OM/%
100.284	27.6642	A-B-C	28.3	23.8	26	0.797
100.267	27.6526	A-B-C	28.3	23.8	26	0.797
100.245	27.8103	A-B-C	19.7	43.7	26	0.355
100.23	27.7963	A-B-C	19.7	43.7	26	0.355
100.229	27.3426	A-B-C	12.4	20	27.9	3.19
100.227	27.8206	A-B-C	19.7	43.7	26	0.355
100.22	27.3203	A-B-C	12.4	20	27.9	3.19
100.215	27.812	A0-A1-B-BC-C	44.8	27.2	13.3	3.633
100.203	27.328	A-B-C	12.4	20	27.9	3.19
100.203	27.7978	A-B-G	22	48.7	25.7	2.862
100.198	27.6047	A-B-C	22.8	21.4	16.6	1.482
100.193	27.8371	A-B-C	19.7	43.7	26	0.355
100.192	27.3412	A-B-C	12.4	20	27.9	3.19
100.19	27.4017	A-B-C	10.8	43.2	45.9	0.824
100.185	27.4298	A-B-C	10.8	43.2	45.9	0.824
100.175	27.3722	A-BG-G	25.7	42.9	15.6	2.44
100.173	27.7868	A-B-C	19.7	43.7	26	0.355
100.166	27.277	A-B-C	12.4	20	27.9	3.19
100.161	27.2767	A-B-C	26.2	29.2	11.7	1.421
100.161	27.4819	A-BG-G	25.7	42.9	15.6	2.44
100.161	27.7125	A-B-C	23.4	41.5	33.2	1.511
100.16	27.6567	A1-A1-B-C	35	15.2	10.1	2.171
100.159	27.7589	A-B-C	22.4	21.8	19.4	4.9
100.158	27.581	A-B-C	23.4	41.5	33.2	3.261
100.158	27.7835	A-B-C	22.4	21.8	19.4	4.9
100.157	27.848	A-B-C	22.4	21.8	19.4	4.9
100.157	27.3781	A-BG-G	25.7	42.9	15.6	2.44
100.149	27.596	A-B-C	23.4	41.5	33.2	3.261
100.146	27.6696	A-B-C	32.7	27.9	14.7	2.601
100.143	27.8645	A-B-C	22.4	21.8	19.4	4.9
100.142	27.4335	A-B-C	10.8	43.2	45.9	0.824
100.142	27.4094	A-B-C	10.8	43.2	45.9	0.824
100.138	27.9563	A-B-C	32.7	27.9	14.7	2.601
100.135	27.3752	A-B	45.1	30.4	12.8	1.784
100.134	27.244	A-B-C	12.4	20	27.9	3.19
100.132	27.3788	A-B-BC-C	42.7	23.1	11.8	4.088
100.122	27.225	A-B-C	12.4	20	27.9	3.19
100.121	27.4553	A-B-C	26.2	29.2	11.7	1.421
100.12	27.7703	A-B-BC-C	22.4	21.8	19.4	0.854
100.115	27.5823	A-B-C	28.3	23.8	26	0.797
100.112	27.7694	A-P-BW	17.6	62.1	18.3	0.859
100.11	27.5149	A-B-C	28.3	23.8	26	0.797
100.104	27.4674	A-BG-G	25.7	42.9	15.6	2.44
100.1	27.3204	A-AC	38.9	20.6	4.4	3.172
100.084	27.1878	A-B-C	12.4	20	27.9	3.19
100.081	27.4553	A-BC	23.5	42.1	33.4	8.052
100.073	27.5995	A-B-C	39.6	36.5	20.2	0.594
100.071	27.3379	A-AB-C	40.9	28.8	10.9	5.739
100.069	27.8973	A0-A1-B-BC-C	44.8	27.2	13.3	3.633
100.068	27.5722	A-AB-B-C	39.6	36.5	20.2	0.594
100.067	27.44	A-B-C	23.4	41.5	33.2	1.511
100.066	27.2252	A-AB-B-C	43.8	27.3	13.8	4.038
100.066	28.2863	A0-A1-B-BC-C	44.8	27.2	13.3	3.633
100.066	27.6215	A-AB-B-C	43.8	27.3	13.8	4.038
100.064	27.4829	A-BG-G	25.7	42.9	15.6	2.44
100.064	27.0657	A-B	49.3	20.1	15	2.381
100.064	27.1741	A-B-C	12.4	20	27.9	3.19
100.063	27.6834	A0-A-B-C	46.1	24.4	17.9	2.194
100.063	27.0276	A-P-BW	17.6	62.1	18.3	0.859
100.062	27.0478	A-B	45.1	30.4	12.8	1.784
100.058	27.712	A-B	23.9	41.8	33.7	2.08
100.052	27.1669	A-P-BW-C	17.6	62.1	18.3	2.1
100.051	27.0817	A-B-C	22.5	41.2	23.5	0.864
100.048	26.9488	A-P-BW	17.6	62.1	18.3	0.859
100.046	27.1382	A-P-BW-C	17.6	62.1	18.3	2.1
100.043	27.4337	A0-A1-B-BC-C	44.8	27.2	13.3	3.633
100.043	28.309	A1-A1-B-C	35	15.2	10.1	2.171
100.041	27.3866	A1-A1-B-C	35	15.2	10.1	2.171
100.036	27.672	A-AB-B-C	43.8	27.3	13.8	4.038
100.034	27.3779	A-AC	38.9	20.6	4.4	3.172
100.033	27.5044	A-B-C	12.4	20	27.9	3.19
100.032	27.25	A-B-C	19.7	43.7	26	0.355
100.031	26.9114	A-B-C	47.6	10.9	11.8	1.656
100.029	28.4339	A1-A1-B-C	35	15.2	10.1	2.171
100.028	27.7323	A-B	23.9	41.8	33.7	2.08
100.028	27.564	A-B-C	11.8	25.7	33.6	0.452
100.027	27.2189	A-B-C	19.7	43.7	26	0.355
100.025	27.1639	A-B-C	22.4	21.8	19.4	4.9
100.023	27.0872	A-B-C	19.7	43.7	26	0.355
100.023	27.6906	A-AB-B-C	43.8	27.3	13.8	4.038
100.023	27.4369	A-BC	23.5	42.1	33.4	8.052
100.021	27.2995	A-B	23.9	41.8	33.7	2.08
100.017	27.2788	A-B-C	18.2	45.8	34.5	1.162
100.016	28.4276	A-B-C	32.7	27.9	14.7	2.601
100.016	27.6113	A-B-C	39.6	36.5	20.2	0.594
100.015	28.409	A-AC	38.9	20.6	4.4	3.172
100.013	27.2033	A-B-C	19.7	43.7	26	0.355
100.012	27.0534	A-B-C	23.4	41.5	33.2	3.261
100.01	26.9006	A-P-BW	17.6	62.1	18.3	0.859
100.008	28.4679	A0-As-AB-C	40.9	28.8	10.9	2.735
100.007	27.2249	A-B-C	19.7	43.7	26	0.355
100.006	27.2594	A-B-C	19.7	43.7	26	0.355
100.005	27.2926	A-B-C	18.2	45.8	34.5	1.162
100.004	28.325	A-B-C	32.7	27.9	14.7	2.601
99.9987	27.0281	A0-A1-B-BC-C	44.8	27.2	13.3	3.633
99.9922	27.343	A-B	23.9	41.8	33.7	2.08
99.9922	27.2876	A-B-C	22.4	21.8	19.4	4.9
99.9908	27.0445	A1-A1-B-C	35	15.2	10.1	2.171
99.9906	27.3204	A-B-C	22.4	21.8	19.4	4.9
99.9876	27.2521	A-B	23.9	41.8	33.7	2.08
99.9812	28.5058	A-AC	38.9	20.6	4.4	3.172
99.9811	27.3039	A-B-C	22.4	21.8	19.4	4.9
99.9799	26.9545	A-B-C	22.5	41.2	23.5	2.69
99.9795	26.9835	A-B-C	22.5	41.2	23.5	3
99.9788	28.0062	A-AB-B-C	44.8	29.6	14.2	3.846
99.9759	27.0926	A-B-C	22.4	21.8	19.4	4.9
99.9735	27.3609	A-BC	23.5	42.1	33.4	8.052
99.9719	27.3267	A-B-C	22.4	21.8	19.4	4.9
99.9702	27.2154	A-B-C	23.4	41.5	33.2	1.511
99.9701	26.8786	A-P-BW	17.6	62.1	18.3	0.859
99.9644	27.2441	A-BC	23.5	42.1	33.4	8.052
99.9637	26.9958	A-B-BC-C	47.6	10.9	11.8	2.432
99.9631	26.9094	A-B-C	22.5	41.2	23.5	2.69
99.9621	26.958	A-B-C	62.5	16.5	10.8	1.362
99.9616	26.9348	A-B-BC-C	47.6	10.9	11.8	2.432
99.9599	27.4808	A-AB-C	40.9	28.8	10.9	5.739
99.9583	27.0991	A-B-C	19.7	43.7	26	0.355
99.9562	26.9115	A-P-BW	17.6	62.1	18.3	0.859
99.9431	28.305	A-AC	38.9	20.6	4.4	3.172
99.9427	27.3396	A-B	23.4	41.5	33.2	6.558
99.9386	27.8969	A-B-C	60.2	22.3	15.8	6.4
99.9346	27.0234	A-B-C	51	16.9	6.6	1.802
99.9308	27.6364	A-AC	38.9	20.6	4.4	3.172
99.9268	27.0385	A-B-C	51	16.9	6.6	1.802
99.924	27.6205	A-AB-C	40.9	28.8	10.9	5.739
99.9152	27.2845	A-AB-C	40.9	28.8	10.9	5.739
99.9139	27.1247	A-B-C	19.7	43.7	26	0.355
99.9043	27.0649	A-P-BW	17.6	62.1	18.3	0.859
99.8893	27.7935	A-AB-B-C	44.8	29.6	14.2	3.846
99.8864	27.6681	A1-A2-B-C	35	15.2	10.1	2.171
99.8856	27.2207	A-B-BC-C	22.4	21.8	19.4	0.854
99.8851	27.3906	A-AB-B-C	43.8	27.3	13.8	4.038
99.8836	27.447	A0-A1-B-BC-C	44.8	27.2	13.3	3.633
99.8833	27.2182	A-B-C	19.7	43.7	26	0.355
99.8818	27.2026	A-B-C	22.4	21.8	19.4	4.9
99.879	27.6511	A-AB-B-C	43.8	27.3	13.8	4.038
99.879	27.0928	A-P-BW	17.6	62.1	18.3	0.859
99.878	27.412	A-AB-B-C	43.8	27.3	13.8	4.038
99.8695	27.9912	A-B-C	32.7	27.9	14.7	2.601
99.8693	27.0978	A-B-C	47.6	10.9	11.8	1.656
99.8681	27.4962	A-AB-B-C	43.8	27.3	13.8	4.038
99.8618	27.1812	A-B-C	22.5	41.2	23.5	3
99.8608	27.8954	A-B-C	32.7	27.9	14.7	2.601
99.8584	28.0989	A1-A1-B-C	35	15.2	10.1	2.171
99.8561	27.5377	A1-A1-B-C	35	15.2	10.1	2.171
99.8533	27.7879	A-AB-B-C	43.8	27.3	13.8	4.038
99.8495	27.4907	A-B-C	33.7	21.1	9.9	1.904
99.8472	27.1495	A-B-C	22.5	41.2	23.5	0.864
99.8447	27.3036	A0-As-AB-C	40.9	28.8	10.9	2.735
99.8423	27.5777	A-AB-B-C	43.8	27.3	13.8	4.038
99.8409	27.1375	A-P-BW-C	17.6	62.1	18.3	2.1
99.8371	27.1699	A-B-C	51	16.9	6.6	1.802
99.837	27.1467	A-P-B-C	62.6	15.4	13.3	0.654
99.831	27.1563	A-P-BW	17.6	62.1	18.3	0.859
99.8302	27.4892	A-B-C	35.5	32.6	23.6	17.135
99.8279	28.35	A-AB-B-C	43.8	27.3	13.8	4.038
99.8245	27.2009	A-B-C	23.4	41.5	33.2	3.261
99.8229	28.4915	A-AB-B-C	43.8	27.3	13.8	4.038
99.8172	28.3247	A-B-C	32.7	27.9	14.7	2.601
99.8166	28.5058	A-AB-B-C	43.8	27.3	13.8	4.038
99.8152	27.1636	A-B-C	62.5	16.5	10.8	1.362
99.8122	28.4697	A-AB-B-C	43.8	27.3	13.8	4.038
99.8118	27.4427	A-AB-B-C	43.8	27.3	13.8	4.038
99.8097	28.3776	A-AB-B-C	43.8	27.3	13.8	4.038
99.8049	27.5092	A-B	42	36.6	20.8	3.164
99.8047	27.8088	A-B	42	36.6	20.8	3.164
99.8045	27.5983	A1-A1-B-C	35	15.2	10.1	2.171
99.8018	28.4534	A-AB-B-C	43.8	27.3	13.8	4.038
99.8015	27.9704	A-B-C	30.4	39.9	23.3	1.383
99.7981	27.1821	A-B-C	22.5	41.2	23.5	3
99.7951	27.5343	A-B-C	24.5	46.3	25.5	5.8
99.7919	27.3779	A0-As-AB-C	40.9	28.8	10.9	2.735
99.7888	28.3273	A0-As-AB-C	40.9	28.8	10.9	2.735
99.7884	27.5392	A-B-C	60.2	22.3	15.8	6.4
99.7862	27.197	A-P-BW	17.6	62.1	18.3	0.859
99.7823	27.78	A-B	42	36.6	20.8	3.164
99.7775	27.2092	A-B-C	47.6	10.9	11.8	1.656
99.7772	27.3106	A0-As-AB-C	40.9	28.8	10.9	2.735
99.7737	28.5334	A-AC	38.9	20.6	4.4	3.172
99.7731	28.0546	A-B-C	33.7	21.1	9.9	1.904
99.7658	28.3905	A-AB-B-C	43.8	27.3	13.8	4.038
99.7636	28.0803	A-B-C	24.5	46.3	25.5	5.8
99.7589	27.8075	A-AB-B-C	44.8	29.6	14.2	3.846
99.7554	27.8264	A-B-C	52.6	26.3	13.5	5.3
99.7531	27.4157	A0-As-AB-C	40.9	28.8	10.9	2.735
99.7508	27.8188	A-B-C	30.4	39.9	23.3	1.383
99.7507	27.7917	A-AB-B-C	44.8	29.6	14.2	3.846
99.7498	27.6343	A-B-C	49.6	28.2	15.3	5.2
99.7484	27.2189	A-B-C	62.5	16.5	10.8	1.362
99.7474	28.1507	A-B-C	33.7	21.1	9.9	1.904
99.7458	27.868	A-B	51.9	27	14.2	5.632
99.7444	28.6484	A-AB-B-C	44.8	29.6	14.2	3.846
99.7409	27.7523	A1-A1-B-C	35	15.2	10.1	2.171
99.7322	27.6763	A-B-C	30.8	40.2	24.6	9.219
99.7321	27.6047	A-B-C	60.2	22.3	15.8	6.4
99.7302	27.7918	A1-A1-B-C	35	15.2	10.1	2.171
99.7266	27.2442	A-B-C	42.7	23.1	11.8	2.46
99.7215	28.2907	A0-A1-B-BC-C	44.8	27.2	13.3	3.633
99.7173	28.0797	A-AB-B-C	44.8	29.6	14.2	3.846
99.716	28.5252	A-AB-B-C	44.8	29.6	14.2	3.846
99.7133	27.6492	A-B-C	30.4	39.9	23.3	1.383
99.7126	27.8415	A-B-C	52.6	26.3	13.5	5.3
99.7124	27.2564	A-P-W-B-C	31.4	44.3	13.8	1.897
99.7121	28.811	A-AC	38.9	20.6	4.4	3.172
99.7112	27.5463	A0-As-AB-C	40.9	28.8	10.9	2.735
99.7109	27.7574	A-B-C	33.7	21.1	9.9	1.904
99.71	27.7328	A-B-C	52.6	26.3	13.5	5.3
99.7059	27.2626	A-P-BW-BC	26.2	41.7	23	2.409
99.7031	28.1619	A1-A1-B-C	35	15.2	10.1	2.171
99.7023	27.7901	A-B-C	33.7	21.1	9.9	1.904
99.7018	27.5525	A1-A1-B-C	35	15.2	10.1	2.171
99.7011	27.3837	A-B-C	52.2	20.5	8.6	4.655
99.7001	27.776	A-B-C	33.7	21.1	9.9	1.904
99.7001	28.7555	A-AB-B-C	44.8	29.6	14.2	3.846
99.6996	28.6389	A-B-BC-C	28	20.1	12.4	3.615
99.6993	27.3613	A-B-C	22.4	21.8	19.4	4.9
99.6992	28.5042	A-AB-B-C	44.8	29.6	14.2	3.846
99.6985	28.6079	A-B-BC-C	28	20.1	12.4	3.615
99.6962	27.8538	A-B	51.9	27	14.2	5.632
99.695	27.8193	A-B-C	24.5	46.3	25.5	5.8
99.6918	28.4792	A-AB-B-C	43.8	27.3	13.8	4.038
99.69	28.7778	A-AB-B-C	44.8	29.6	14.2	3.846
99.6897	27.277	A-B-C	47.6	10.9	11.8	1.656
99.6891	27.3297	A-B-C	22.4	21.8	19.4	4.9
99.6888	28.0341	A-AB-B-C	44.8	29.6	14.2	3.846
99.6869	28.6027	A-B-BC-C	28	20.1	12.4	3.615
99.6843	27.8267	A0-A1-B-BC-C	44.8	27.2	13.3	3.633
99.6835	27.7941	A-B-C	52.6	26.3	13.5	5.3
99.6827	27.3623	A-B-C	47.6	10.9	11.8	1.656
99.6809	27.3493	A-B-C	22.4	21.8	19.4	4.9
99.6803	27.3346	A-B-C	22.5	41.2	23.5	3
99.6791	28.5732	A-B-BC-C	28	20.1	12.4	3.25
99.6755	28.5264	A1-A1-B-C	35	15.2	10.1	2.171
99.6741	27.5323	A0-As-AB-C	40.9	28.8	10.9	2.735
99.6722	27.7205	A-B	51.9	27	14.2	5.632
99.6673	27.828	A-B	51.9	27	14.2	5.632
99.6672	27.8711	A-B	51.9	27	14.2	5.632
99.6664	27.2976	A-P-BW	17.6	62.1	18.3	0.859
99.6634	27.7746	A-B-C	52.6	26.3	13.5	5.3
99.6604	28.3329	A-AB-B-C	43.8	27.3	13.8	4.038
99.6604	28.535	A0-A1-B-BC-C	44.8	27.2	13.3	3.633
99.6595	28.1367	A1-A1-B-C	35	15.2	10.1	2.171
99.6589	28.4585	A-AB-B-C	44.8	29.6	14.2	3.846
99.658	27.3608	A-P-B-C	62.6	15.4	13.3	0.654
99.657	28.5613	A-B-BC-C	28	20.1	12.4	3.25
99.6562	27.3717	A-P-BW-C	26.2	41.7	23	2.6
99.6525	28.4707	A-AB-B-C	44.8	29.6	14.2	3.846
99.6519	28.0215	A-AB-B-C	44.8	29.6	14.2	3.846
99.6513	27.3169	A-B-BC-C	47.5	22.7	7.3	2.983
99.6509	27.3416	A-P-BW	25.3	44.5	18.5	2.594
99.6487	27.329	A-P-BW	17.6	62.1	18.3	0.859
99.648	27.3996	A-B-C	22.5	41.2	23.5	3
99.6472	27.3806	A-P-BW-C	17.6	62.1	18.3	2.1
99.646	27.8033	A-B	51.9	27	14.2	5.632
99.631	27.8977	A-B	51.9	27	14.2	5.632
99.6284	27.4608	A-B-C	22.5	41.2	23.5	3
99.6281	27.8281	A-B	51.9	27	14.2	5.632
99.6272	28.4587	A-AB-B-C	44.8	29.6	14.2	3.846
99.6261	28.0922	A1-A1-B-C	35	15.2	10.1	2.171
99.6259	28.5351	A-B-BC-C	28	20.1	12.4	3.25
99.6241	27.393	A-P-B-C	62.6	15.4	13.3	0.654
99.6206	28.0473	A1-A1-B-C	35	15.2	10.1	2.171
99.6153	27.4087	A-B-BC-C	43.5	19.1	15.1	2.129
99.6145	28.3002	A-B-C	47.5	22.7	7.3	3.67
99.6135	28.5095	A-B-BC-C	28	20.1	12.4	3.25
99.6125	27.639	A0-As-AB-C	40.9	28.8	10.9	2.735
99.6119	27.4483	A-P-BW-C	26.2	41.7	23	2.6
99.6085	27.4324	A-P-BW	17.6	62.1	18.3	0.859
99.6072	28.6232	A0-A1-B-BC-C	44.8	27.2	13.3	3.633
99.6072	28.533	A-B-BC-C	28	20.1	12.4	3.25
99.6065	28.5887	A-AB-B-C	44.8	29.6	14.2	3.846
99.6022	28.251	A-AB-B-C	43.8	27.3	13.8	4.038
99.6018	27.4264	A-B-C	47.6	10.9	11.8	2.13
99.599	27.4748	A-B-C	22.5	41.2	23.5	3
99.599	28.5366	A-B-C	28	20.1	12.4	3.261
99.5983	28.6363	A1-A1-B-C	35	15.2	10.1	2.171
99.5972	28.5602	A-B-BC-C	28	20.1	12.4	3.25
99.5965	27.5299	A-B-C	22.4	21.8	19.4	4.9
99.5954	28.7049	A-AC	38.9	20.6	4.4	3.172
99.59	27.5574	A-B-C	23.4	41.5	33.2	1.511
99.5893	27.4622	A-P-B-C	62.6	15.4	13.3	0.654
99.5836	28.6505	A-B-C	32.7	27.9	14.7	2.601
99.5736	27.5554	A-B-C	19.7	43.7	26	0.355
99.5726	27.4771	A-P-BG-G-C	22	48.7	25.7	2.862
99.5714	27.7669	A-B-C	32.7	27.9	14.7	2.601
99.5711	27.5061	A-P-B-C	62.6	15.4	13.3	0.654
99.5704	27.4919	A-P-BG-G-C	22	48.7	25.7	2.862
99.5694	27.5321	A-B-C	51	16.9	6.6	1.802
99.5654	27.6144	A-B	23.4	41.5	33.2	6.558
99.5646	27.547	A-B-C	22.5	41.2	23.5	0.864
99.5599	27.5402	A-B-C	47.5	22.7	7.3	2.2
99.5587	27.664	A-B	23.9	41.8	33.7	2.08
99.5549	28.2758	A-B-C	28	20.1	12.4	3.261
99.5508	28.1346	A1-A1-B-C	35	15.2	10.1	2.171
99.545	27.9904	A-B-C	11.8	25.7	33.6	0.452
99.5419	27.6161	A-B-C	19.7	43.7	26	0.355
99.5403	27.6722	A-B-C	27.6	17.3	11.1	3.099
99.5402	28.0282	A-B-C	10.8	43.2	45.9	0.824
99.5379	28.185	A0-A1-B-BC-C	44.8	27.2	13.3	3.633
99.5363	27.5715	A-P-B-C	62.6	15.4	13.3	0.654
99.5362	27.9063	A-B-C	32.7	27.9	14.7	2.601
99.5297	27.5787	A-B-C	22.5	41.2	23.5	2.69
99.5284	27.6063	A-B-C	22.5	41.2	23.5	0.864
99.5274	28.0437	A-B-C	10.8	43.2	45.9	0.824
99.5235	27.6252	A-B-C	22.5	41.2	23.5	3
99.5188	28.4007	A-AC	38.9	20.6	4.4	3.172
99.5188	28.0741	A-AB-B-C	43.8	27.3	13.8	4.038
99.5107	28.2264	A-B-C	32.7	27.9	14.7	2.601
99.5003	28.0741	A-B-C	31.6	31.1	27	0.768
99.4994	28.2452	A-AC	38.9	20.6	4.4	3.172
99.4984	28.0707	A-B-C	10.8	43.2	45.9	0.824
99.4911	28.1497	A-B-C	27.6	17.3	11.1	3.099
99.4901	27.6455	A-B-C	27.6	17.3	11.1	3.099
99.4898	27.8358	A-B-C	27.6	17.3	11.1	3.099
99.4812	27.8763	A-B-C	27.6	17.3	11.1	3.099
99.4811	28.0244	A-B-C	39.6	36.5	20.2	0.594
99.4804	27.6671	A-B-C	27.6	17.3	11.1	3.099
99.4798	27.7016	A-B-C	27.6	17.3	11.1	3.099
99.4776	28.5711	A-AC	38.9	20.6	4.4	3.172
99.4768	28.4579	A-AB-B-C	44.8	29.6	14.2	3.846
99.4747	27.7865	A-B-C	27.6	17.3	11.1	3.099
99.4747	28.0377	A-AB-B-C	39.6	36.5	20.2	0.594
99.4744	27.7556	A-B-C	27.6	17.3	11.1	3.099
99.474	28.3435	A-B-BC-C	28	20.1	12.4	5.659
99.4714	28.0919	A-B-C	39.6	36.5	20.2	0.594
99.464	27.9264	A-B-C	27.6	17.3	11.1	3.099
99.4601	27.716	A-B-C	27.6	17.3	11.1	3.099
99.459	28.1127	A-B-C	39.6	36.5	20.2	0.594
99.4582	27.9111	A-B-C	21.1	20	16.1	1.364
99.4541	28.0559	A1-A1-B-C	35	15.2	10.1	2.171
99.4535	28.0614	A0-A1-B-BC-C	44.8	27.2	13.3	3.633
99.4419	28.005	A-B-C	27.6	17.3	11.1	3.099
99.4404	28.134	A-B-C	27.6	17.3	11.1	3.099
99.4353	27.7599	A-B-C	27.6	17.3	11.1	3.099
99.4253	28.1643	A-B-C	27.6	17.3	11.1	3.099
99.4184	28.082	A-B-C	11.8	25.7	33.6	0.452
99.4171	28.355	A-AC	38.9	20.6	4.4	3.172
99.4167	27.9529	A-B-C	27.6	17.3	11.1	3.099
99.4167	28.106	A-B-C	27.6	17.3	11.1	3.099
99.4143	28.0174	A-B-C	27.6	17.3	11.1	3.099
99.4051	28.0558	A-B-C	28	20.1	12.4	3.261
99.4031	28.1707	A-B-C	27.6	17.3	11.1	3.099
