# Supplementary material for: Using InVEST to evaluate water yield services in Shangri-La, Northwestern Yunnan, China
Source: PeerJ. 2022 Jan 14;10:e12804. doi: 10.7717/peerj.12804 (PMC8763040; doi:10.7717/peerj.12804)
Supplement: Supplemental Information 2 [file peerj-10-12804-s002.xlsx]

## Sheet: Sheet1
region	1974verage water yield	1974average precipitation	1974average PET	1989verage water yield	1989average precipitation	1989average PET	2003verage water yield	2003average precipitation	2003average PET	2015verage water yield	2015average precipitation	2015average PET	soil depth	PAWC
Luoji	183.97	772.858	1107.45	292.27	860.987	983.884	214.98	801.813	1064.17	160.88	711.025	1048.43	841.749	0.267781
Dongwang	225.69	745.059	1057.19	231.87	727.688	943.117	314.68	834.718	953.471	233.44	735.664	963.202	767.928	0.289648
Naxi	186.12	741.956	1070.72	292.12	845.736	936.421	245.73	795.132	953.605	188.15	726.574	951.357	834.711	0.292813
Geza	231.77	750.749	1067.82	275.47	792.391	948.771	265.54	800.12	991.933	199.58	712.132	985.645	738.471	0.294229
Wujing	159.83	749.647	1095.49	354.26	951.644	949.759	195.91	769.36	1009.41	152.76	707.865	1006.2	786.498	0.301666
Shangjiang	216.29	864.022	1126.72	359.12	993.544	986.621	260.36	903.388	1057.62	192.05	815.123	1071.31	915.907	0.274439
Jinjiang	265.32	926.886	1172.31	380.3	1017.75	1038.1	339.58	993.038	1105.41	227.52	859.63	1137.14	880.129	0.260564
Hutiaoxia	305.12	904.255	1172.42	398.85	984.793	1041.79	377.96	969.173	1110.29	265.22	832.869	1130.47	769.253	0.26094
Jiantang	155.02	685.798	1094.84	337.33	876.394	956.215	177.69	698.406	1016.82	146.09	643.709	999.233	799.43	0.272975
Xiaozhongdian	230.01	783.179	1125.42	395.77	945.68	986.336	264.14	810.82	1059.86	205.96	732.607	1057.34	777.081	0.274066
Sanba	268.41	838.516	1144.83	340.1	912.739	1018.73	300.18	881.699	1098.13	220.93	769.104	1094.89	802.786	0.286391
